# Supplementary material
Source: publisher figshare collection journal article supplement (https://tandf.figshare.com/articles/dataset/_/11505561)
Supplement: Supplementary file 1 [file 1]

# Supplementary materials

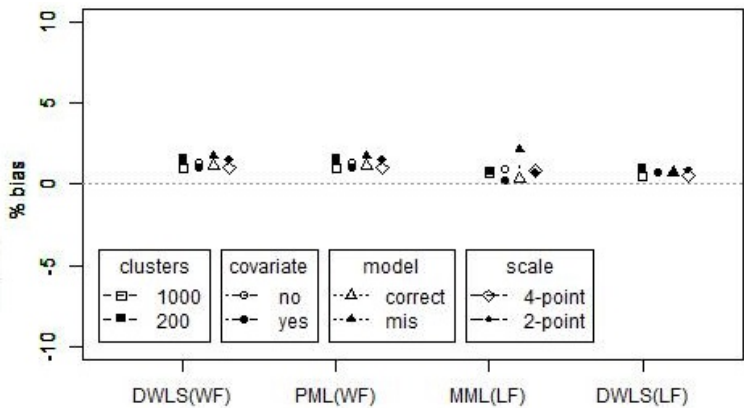

Figure 1: Bias of within factor loadings in unbalanced data.

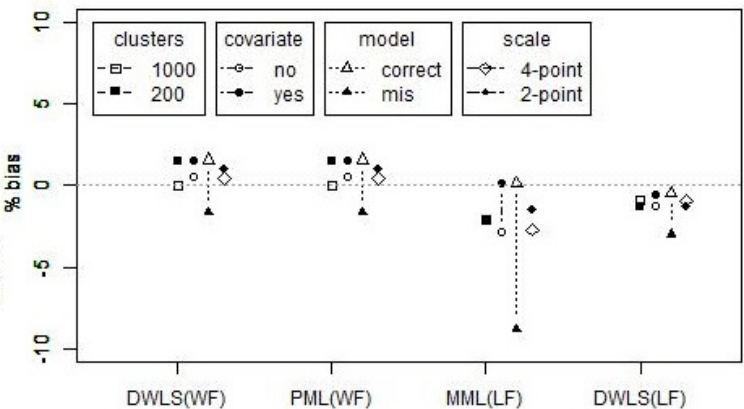

Figure 2: Bias of between factor loadings in unbalanced data.

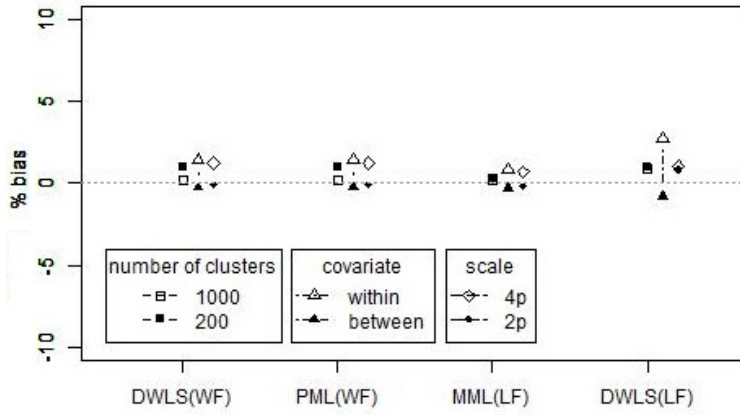

Figure 3: Bias of covariate regression coefficients in balanced data.

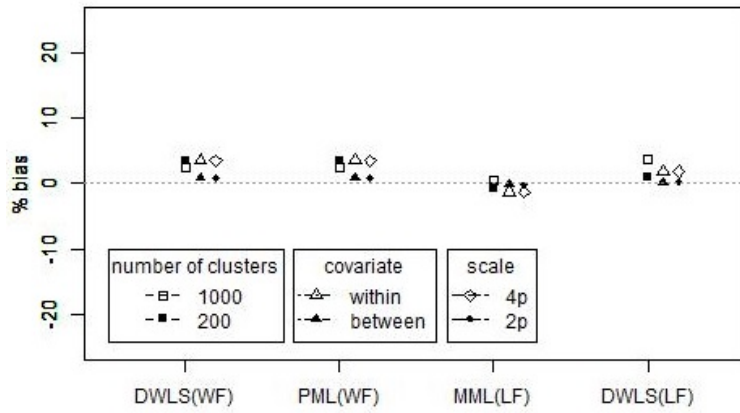

Figure 4: SE bias of covariate regression coefficients in balanced data.

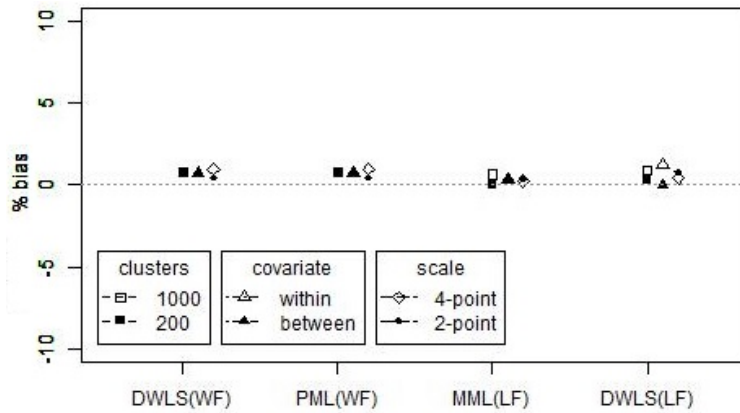

Figure 5: Bias of covariate regression coefficients in unbalanced data.

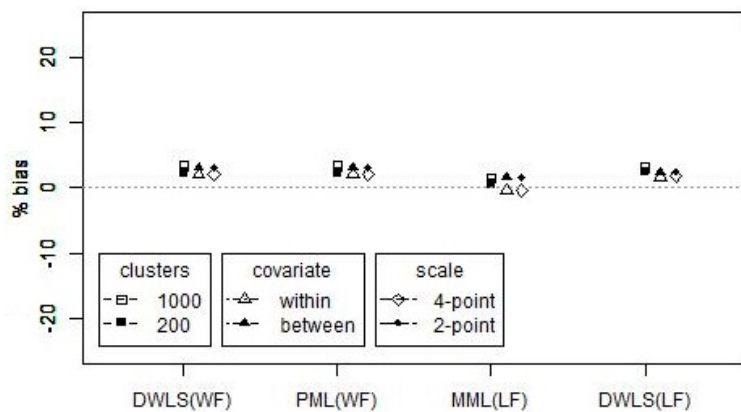

Figure 6: SE bias of covariate regression coefficients in unbalanced data.

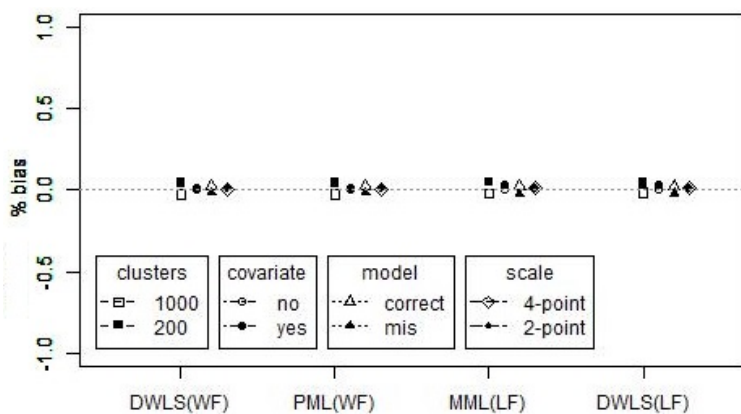

Figure 7: Bias of thresholds in balanced data.

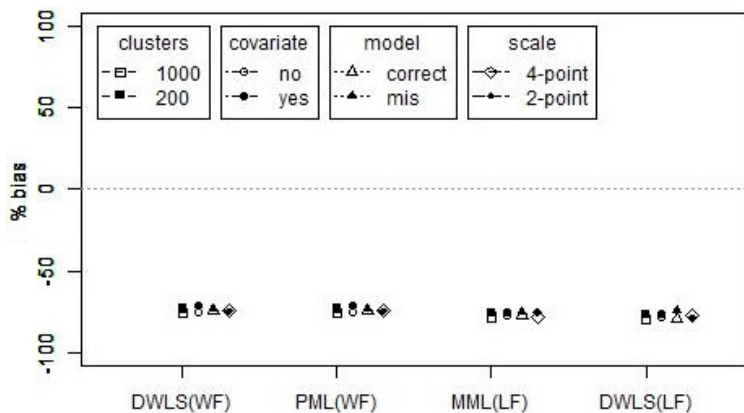

Figure 8: SE bias of thresholds in balanced data.

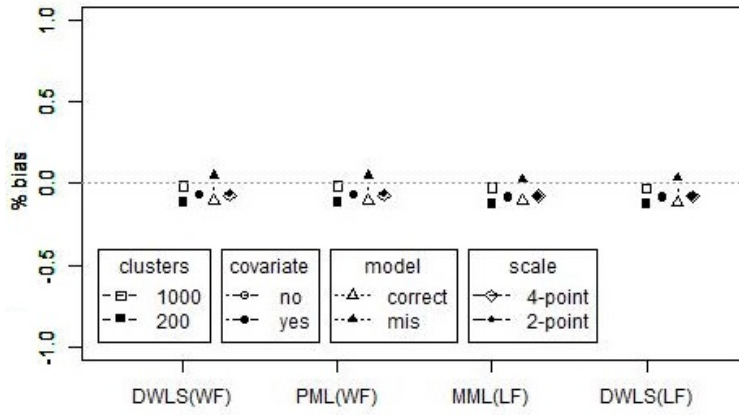

Figure 9: Bias of thresholds in unbalanced data.

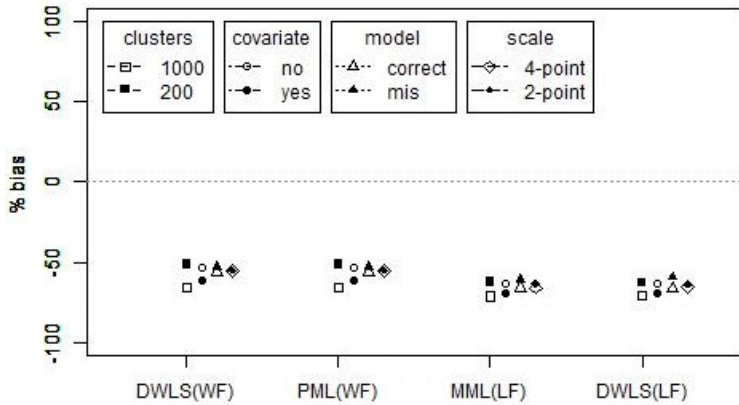

Figure 10: SE bias of thresholds in unbalanced data.
