# Supplementary material
Source: publisher figshare collection journal article supplement (https://tandf.figshare.com/articles/dataset/_/11505561)
Supplement: Supplementary file 2 [file 1]

Archive with 2 entries (2 files):
- hsem_a_1689366_sm2493.pdf
- hsem_a_1689366_sm2489.pdf
